# Supplementary material for: Ultrasound on the Frontlines: Empowering Paramedics with Lung Ultrasound for Dyspnea Diagnosis in Adults—A Pilot Study
Source: MDPI journal article supplement (doi:10.3390/diagnostics13223412), 2023-11-09
Supplement: s1 [file s1]

## KARTA MEDYCZNYCH CZYNNOŚCI RATUNKOWYCH

Oznaczenie dysponenta zespołu ratownictwa medycznego (ZRM)

Kod ZRM realizującego zlecenie:

Nr zlecenia wyjazdu:

## I - WYWIAD

## MIEJSCE ZDARZENIA

w domu.....☐  
 w miejscu publicznym.....☐  
 w ruchu uliczno-drog.....☐  
 w pracy.....☐ w szkole.....☐  
 w rolnictwie.....☐

## II - BADANIE

## GLASGOW-COMA-SCALE

## OTWIERANIE OCZU

spontanicznie.....4  
 na głos.....3  
 na ból.....2  
 brak.....1

## REAKCJA SŁOWNA

zorientowany.....5  
 spłątany.....4  
 niewłaściwe słowa.....3  
 niezrozumiałe dźwięki.....2  
 brak.....1

## REAKCJA RUCHOWA

wykonuje polecenia.....6  
 lokalizacja bólu.....5  
 ucieczka od bólu.....4  
 zgłębowa.....3  
 wyprostna.....2  
 brak.....1

SUMA

## RTS

## CZ. ODDECHÓW

10-29.....4  
 >29.....3  
 6-9.....2  
 1-5.....1  
 brak.....0

## RR SKURCZOWE

>89.....4  
 76-89.....3  
 50-75.....2  
 1-49.....1  
 0.....0

## GCS

13-15.....4  
 9-12.....3  
 6-8.....2  
 4-5.....1  
 3.....0

SUMA

## UKŁAD ODDECHOWY

częstość oddechów...../min

duszność.....T N

sinica.....T N

bezdych.....T N

szmer prawidłowy.....L P

furczenie.....L P

szwisty.....L P

trzeszczenie.....L P

rżenie.....L P

brak szmeru.....L P

inne.....L P

Saturacja.....%

## ŻRENICZE

Reakcja na światło:

prawidłowa.....L P

powolna.....L P

brak.....L P

szerokość:

normalna.....L P

wąska.....L P

szeroka.....L P

CIŚNIENIE TĘTNICZE

mm Hg

TĘTNO

miarowe

/min niemiar.

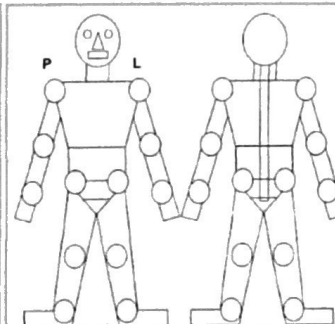

☐ brak obrażeń  
 O Złamanie otwarte  
 Z Złamanie zamknięte  
 W Zwichnięcie  
 S Stłuczenie  
 R Rana  
 K Krwotok z rany  
 M Zmiażdżenie  
 A Amputacja  
 N Ból nieurazowy  
 P Oparzenie

stopnia

stopnia

oparzenie wżwne

Obrażenia anatomiczne kwalifikujące do centrum urazowego  
 penetrujące rany głowy i tułowia lub urazy tępe  
 z objawami uszkodzenia narządów wewnętrznych  
 głowy, klatki piersiowej i brzucha  
 amputacja kończyny powyżej kolana lub łokcia  
 rozległe zmiażdżenia kończyn  
 uszkodzenie rdzenia kręgowego  
 złamanie kończyny z uszkodzeniem naczyń i nerwów  
 złamanie co najmniej dwóch proksymalnych kości długich kończyny lub miednicy

## OBJAWY

wstrząs.....T N

NZK.....T N

obj. oponowe.....T N

drgawki.....T N

afazja.....T N

wymioty.....T N

biegunka.....T N

krwawienie.....T N

obrzęki.....T N

zasłabnięcie.....T N

inne

cięża.....T N

poród.....T

chor. zakaźna.....T

## SKÓRA

Wygląd:

w normie.....

błada.....

rumień.....

zażółcenie.....

sinica obw.....

sinica centr.....

Wilgotność:

w normie.....

wilgotna.....

sucha.....

Temperatura:

w normie.....

chłodna.....

ciepła.....

## JAMA BRZUSZNA

w normie.....

bolesność palpacyjna.....

brak perystaltyki.....

objawy otrzewnowe.....

OCENA PSYCHO-RUCH.

w normie.....

spowolniały.....

pobudzony.....

agresywny.....

## TONY SERCA

czyste/głośnie.....

stłumione.....

inne.....

NIEDOWŁAD / PORAŻENIE

kończyna górna.....L P

kończyna dolna.....L P

ZAPACH Z UST

rozpuszczalnik org.....

alkohol.....

inne.....

POZIOM

mg%

GLUKOZY

g/l

## EKG

Rytm zatokowy.....

Tachykardia nadkomorowa.....

Tachykardia komorowa.....

Migotanie / trzepotanie przedsionków.....

AV blok.....

sVES.....

VES.....

VF/VT.....

Asystolia.....

PEA.....

Rozrusznik.....

OZW.....

Zawal.....

inne.....

## OPIS

## III - ROZPOZNANIE

OPIS

## IV - POSTĘPOWANIE Z PACJENTEM

## CZYNNOŚCI

odsysanie..... defibrylacja..... kołnierz..... linia żył. obw.....

went. workiem..... stymulacja zew..... deska ortoped..... linia żył. cent.....

rurka UG..... kardiowersja..... materac próż..... cewnikowanie.....

intubacja..... masaż serca..... unieruchomienie..... sonda żołąd.....

respirator..... EKG..... opatrunek..... monitorowanie.....

tlenoter. bierna..... teletransmisja..... inne.....

ZALECENIA / UWAGI KIEROWNIKA ZESPOŁU

## ZASTOSOWANE LEKI, WYROBY MED. ( nazwa, dawka, droga podania)

## V - DANE PACJENTA I PRZEKAZANIE PACJENTA

## DANE PACJENTA

Imię: .....

Nazwisko: .....

Adres zamieszkania: .....

ul:.....nr:.....m:.....

Rodz. i nr. dok. tożsamości: .....

Ident. NFZ:

Data urodzenia / wiek: .....

NUMER PESEL pacjenta: .....

Podpis i pieczęć kierownika ZRM: .....

Zespół (ZP) .....

data udzielenia pomocy .....

## Decyzja podmiotu leczniczego:

☐ Przyjęcie pacjenta ☐ Odmowa przyjęcia

pieczęć IP/SOR podpis i pieczęć lekarza

Przekazanie pacjenta w IP/SOR / innym:

data.....godz.....min.....

Stwierdzenie zgonu / odstąpienie od med. czynności rat.

data.....godz.....min.....

41) Załącznik w brzmieniu ustalonym przez § 1 pkt 29 rozporządzenia, o którym mowa w odnośniku 3.

# **EMERGENCY MEDICAL SERVICE CARD**

## **I HISTORY**

### **LOCATION**

Home  
Public place  
Traffic  
Workplace  
School  
Farm

## **II EXAMINATION**

### **GLASGOW COMA SCALE**

#### **EYE OPENING**

|               |   |
|---------------|---|
| Spontaneously | 4 |
| To speech     | 3 |
| To pain       | 2 |
| No response   | 1 |

#### **VERBAL RESPONSE**

|                         |   |
|-------------------------|---|
| Well oriented           | 5 |
| Confused                | 4 |
| Inappropriate words     | 3 |
| Incomprehensible sounds | 2 |
| No response             | 1 |

#### **MOTOR RESPONSE**

|                           |   |
|---------------------------|---|
| Obeys commands            | 6 |
| Localises pain            | 5 |
| Normal flexion withdrawal | 4 |
| Abnormal flexion          | 3 |
| Abnormal extension        | 2 |
| No response               | 1 |

**SCORE:**

## **RTS**

### **RESPIRATORY RATE**

10-29 4 pts  
>29 3 pts  
6-9 2 pts  
1-5 1 pts  
NONE 0 pts

### **SYSTOLIC BLOOD PRESSURE**

>89 4 pts  
76-89 3 pts  
50-75 2 pts  
1-49 1 pts  
NONE 0 pts

## **GCS**

13-15 4 pts  
9-12 3 pts  
6-8 2 pts  
4-5 1 pts  
3 0 pts

**RTS SCORE:**

## **RESPIRATORY SYSTEM**

**Respiratory rate (/min)**

### **Signs and symptoms**

|          |        |
|----------|--------|
| Dyspnea  | YES/NO |
| Cyanosis | YES/NO |
| Apnea    | YES/NO |

### **Auscultation (R and L side separately)**

Vesicular sounds  
Rhonchi  
Weezing  
Fine crackles  
Coarse crackles  
No sounds  
Other

### **Oxygen saturation (%)**

## **PUPILS**

**Light reflex (R and L side separately)**

normal

slow

absent

## **SIZE**

normal

myosis

mydriasis

## **BLOOD PRESSURE (mmHg)**

## **PULSE (/min)**

**(regular/irregular)**

**Trauma – graphical representation  
(affected body part to be marked on a  
pictogram)**

- none
- open fracture
- closed fracture
- sprain
- contusion
- wound
- bleeding
- crush
- amputation
- non-traumatic pain
- burn

## **Burn area and severity estimation (%)**

### **Anatomical criteria for admission to Trauma Center:**

- Penetrating injury to head and torso or blunt trauma with signs of injury of internal organs of the head, chest and abdomen
- Traumatic amputation above knee or elbow
- Extensive extremities crush injury
- Spinal cord injury
- Extremity fractures with signs of vascular or neural injury
- Fracture in two or more long bones and pelvic fracture

## **SIGNS**

|                   |        |
|-------------------|--------|
| - Shock           | YES/NO |
| - Cardiac arrest  | YES/NO |
| - Meningeal signs | YES/NO |
| - Convulsions     | YES/NO |
| - Aphasia         | YES/NO |
| - Vomiting        | YES/NO |
| - Diarrhoea       | YES/NO |
| - Bleeding        | YES/NO |
| - Oedema          | YES/NO |
| - Syncope         | YES/NO |

## **OTHER**

- Pregnancy
- Labour
- Infectious disease

## **SKIN**

### **Appearance**

- Normal
- Pale
- Erythema
- Jaundice
- Peripheral cyanosis
- Central cyanosis

### **Texture**

- Normal
- Moist
- Dry

### **Temperature**

- Normal
- Cold
- Warm

## **ABDOMEN**

- Normal
- Tenderness to palpation
- No peristalsis
- Peritoneal signs

## **PSYCHOMOTOR ASSESMENT**

- Normal
- Inhibited
- Agitated
- Aggressive

## **HEART SOUNDS**

- Clear/loud
- Muffled
- Other

## **PARALYSIS**

(side L and R separately)

- Upper extremity
- Lower extremity

## **BREATH SMELL**

- Acetone
- Alcohol
- Other

## **GLUCOSE LEVEL**

(mg% or g/l)

## **ECG**

- Sinus rhythm
- Supraventricular tachycardia
- Ventricular tachycardia
- Atrial fibrillation
- Atrioventricular block
- Supraventricular extrasystoles
- Ventricular extrasystoles
- VF/VT
- Asystole
- PEA
- ICD
- Acute coronary syndrome
- Myocardial infarction
- Other

## **EXAMINATION – Open text**

### **III – DIAGNOSIS (three ICD-10 codes)**

### **IV – MEDICAL INTERVENTIONS**

#### **INTERVENTION**

Suction  
Manual ventilatory support  
Oropharyngeal tube  
Tracheal intubation  
Mechanical ventilation  
Oxygen supplementation  
Defibrillation  
External stimulation  
Cardioversion  
Chest compressions  
Teletransmission  
Collar  
Spinal board  
Vacuum mattress  
Stabilisation  
Dressing  
Peripheral vein cannulation  
Central vein cannulation  
Urinary catheter placement

Gastric tube placement  
Monitoring  
Other

## **DRUGS AND EQUIPMENT USED (open text)**

## **V - PERSONAL DATA AND PATIENT HANDOVER**

### **PATIENT DATA**

Name  
Surname  
Address  
ID number

**NFZ code**  
**Birth date/Age**  
**Personal Identification Number (PESEL)**

**Signature and stamp of the emergency team leader**

**Date**

### **Healthcare facility decision**

Admission  
Admission refusal

Emergency department stamp  
ED doctor stamp

### **Patient handover to ED:**

Date and time

### **Confirmation of death/abandonment of medical rescue**

Date and time
